# Supplementary material
Source: MDPI journal article supplement (https://www.mdpi.com/2673-7256/3/2/16)
Supplement: s1 [file s1]

## Supporting Information

### *Experimental Part*

All of the starting compounds, such as diamines, aldehyde and  $\text{Cu}(\text{OAc})_2 \cdot 2\text{H}_2\text{O}$  were directly used for the preparation of the ligands and complexes. A Teflon vessel inserted into a steel autoclave was utilized to carry out the reaction; the ligands (L-1 and L-2) were dissolved in ethanol and added to the ethanol-dissolved  $\text{Cu}(\text{OAc})_2 \cdot 2\text{H}_2\text{O}$ . The solid complexes were ultimately precipitated in microcrystalline form when the autoclave was heated at self-induced pressure for 6 hours at 70 °C. The Cu (II) complexes are sparingly soluble in acetonitrile, methanol, and other polar solvents but are highly soluble in DMF and DMSO.

### **Characterization techniques used for analysis of Cu (II) complexes.**

A JMS-S3000 SpiralTOF™-plus Ultra-High Mass Resolution MALDI-TOFMS System (IICT, Hyderabad) was used. The FESEM images were captured on a Quanta FEG 250. The X-ray photoelectron spectroscopic (XPS) spectra were obtained by using a Shimadzu 3140 X-ray photoelectron spectrometer through an excitation energy of 1253.6 eV (Mg Ka) and with 80 eV energy. Thermograms of all samples were obtained using a Shimadzu differential thermal analyzer (DTG-60H) with a heating rate of 10°C min<sup>-1</sup> in the range from 50 to 1000 °C under a nitrogen purging rate of 20 mL/minute. Brunauer–Emmett–Teller (BET) surface areas were determined by nitrogen adsorption–desorption isotherm measurements at 77 K on a Quantachrome autosorb automated gas sorption system. All of the photoreactions were performed by using a multitube photoreactor system with tungsten visible light (Lelesil Innovative Systems, India). The UV-visible DRS spectra were measured on a JASCO V-760 UV-vis spectrophotometer. The photoluminescence (PL) spectra of the new nanomaterials were estimated on a HORIBA Fluoromax Plus with respect to their excitation with a slit width of 1.5 nm. The oxidation potentials were obtained with an electrochemical workstation (CHI 660) in a standard three-electrode system. A flexible fluorine-doped tin oxide (FTO) substrate (1 cm × 1 cm) covered with the catalyst, acted as the working electrode. An Ag/AgCl and a platinum wire were used as the reference and counter electrodes, respectively, with 0.05 M K<sub>2</sub>SO<sub>4</sub> solution as the electrolyte. FTIR spectra were recorded using a Shimadzu spectrometer by applying KBr pellets with 4 cm<sup>-1</sup> resolution.

**Table S1. Physicochemical and elemental data of C-1 and C-2 complexes**

| Complex | % of | DP | % C | % H | % X | % N | % Cu | $\Lambda_m \text{ ohm}^{-1} \text{ mol}^{-1}$ |
|---------|------|----|-----|-----|-----|-----|------|-----------------------------------------------|
|---------|------|----|-----|-----|-----|-----|------|-----------------------------------------------|

|     | yield | (°C) | (calcd)          | (calcd)        | (calcd)             | (calcd)        | (calcd)          | cm <sup>2</sup> |
|-----|-------|------|------------------|----------------|---------------------|----------------|------------------|-----------------|
| C-1 | 61    | 386  | 65.58<br>(65.63) | 3.32<br>(3.34) | 6.89 (Cl)<br>(6.92) | 5.43<br>(5.47) | 12.33<br>(12.40) | 12.07           |
| C-2 | 59    | 392  | 67.76<br>(67.80) | 3.42<br>(3.45) | 3.78 (F)<br>(3.83)  | 5.62<br>(5.65) | 12.74<br>(12.81) | 9.17            |

IICT - HYDERABAD

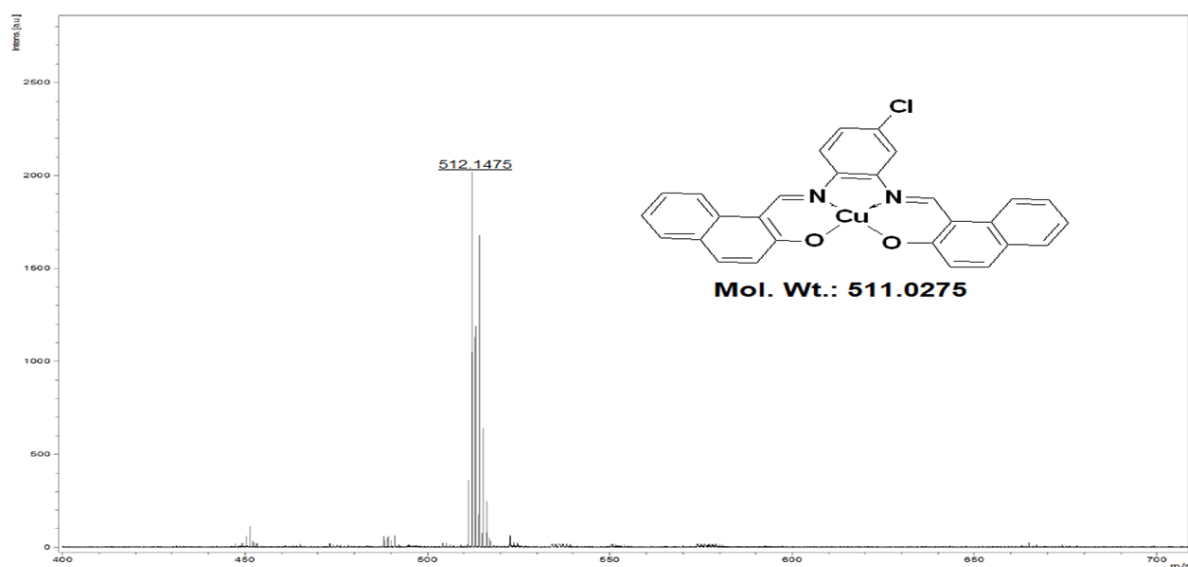

Figure S1. HR MALDI mass spectrum of the C-1 complex.

IICT - HYDERABAD

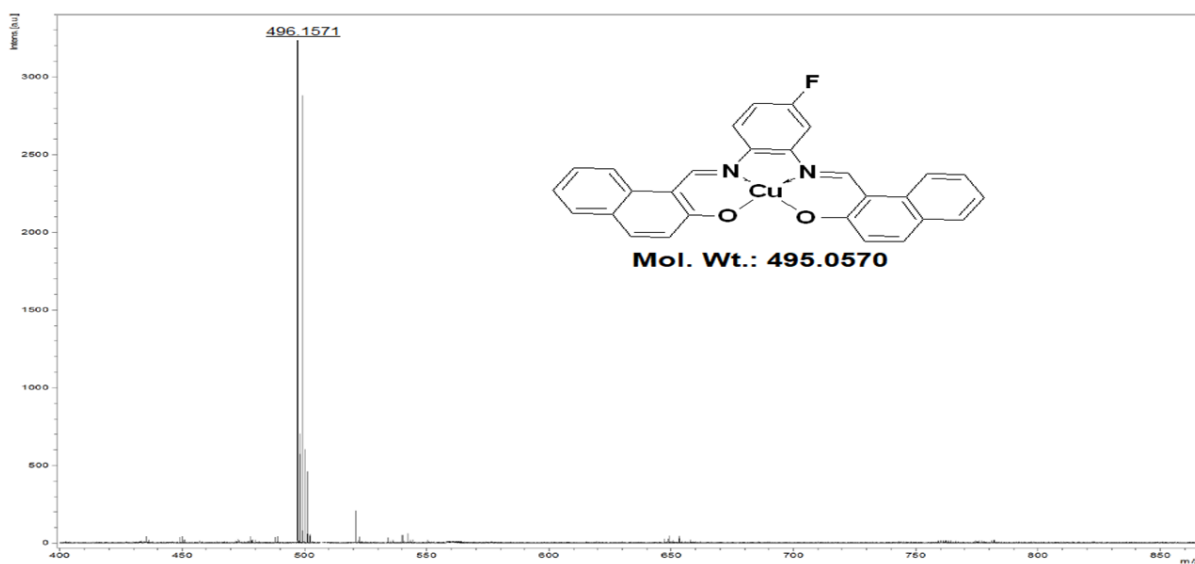

Figure S2. HR MALDI mass spectrum of the C-2 complex.

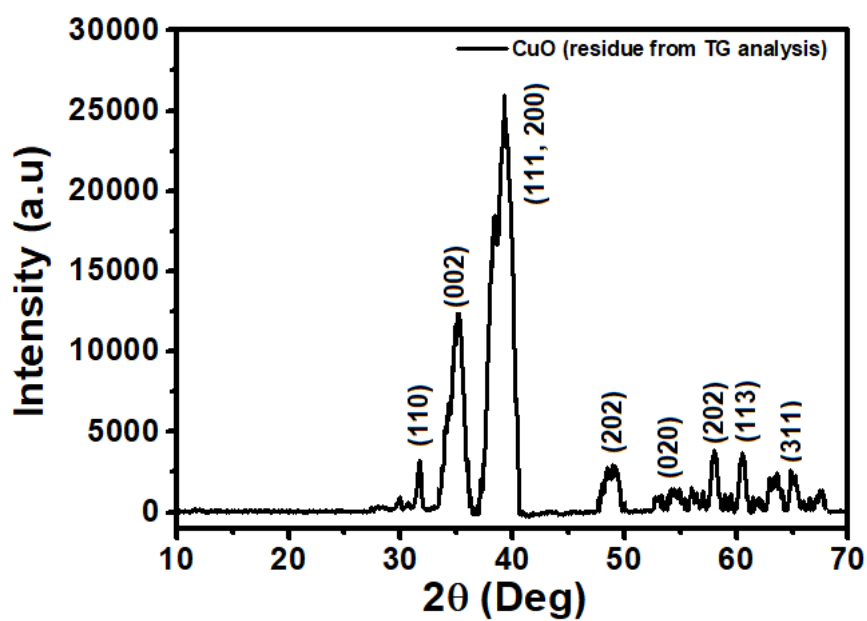

Figure S3. Powder XRD pattern of CuO residue formed from TG analysis.

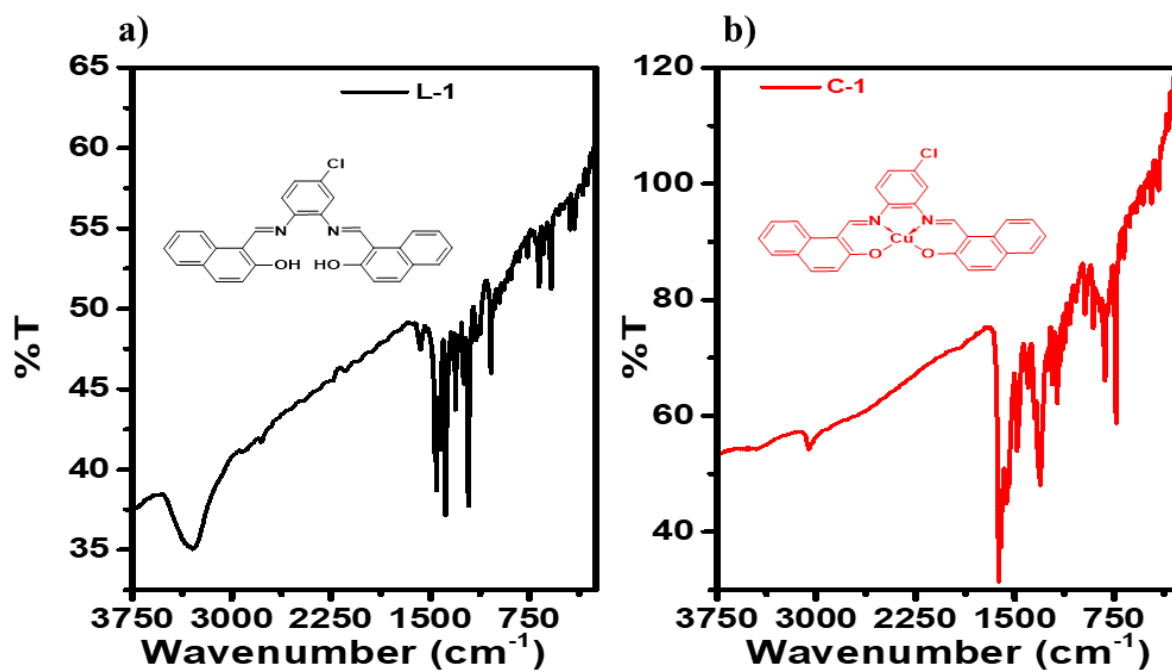

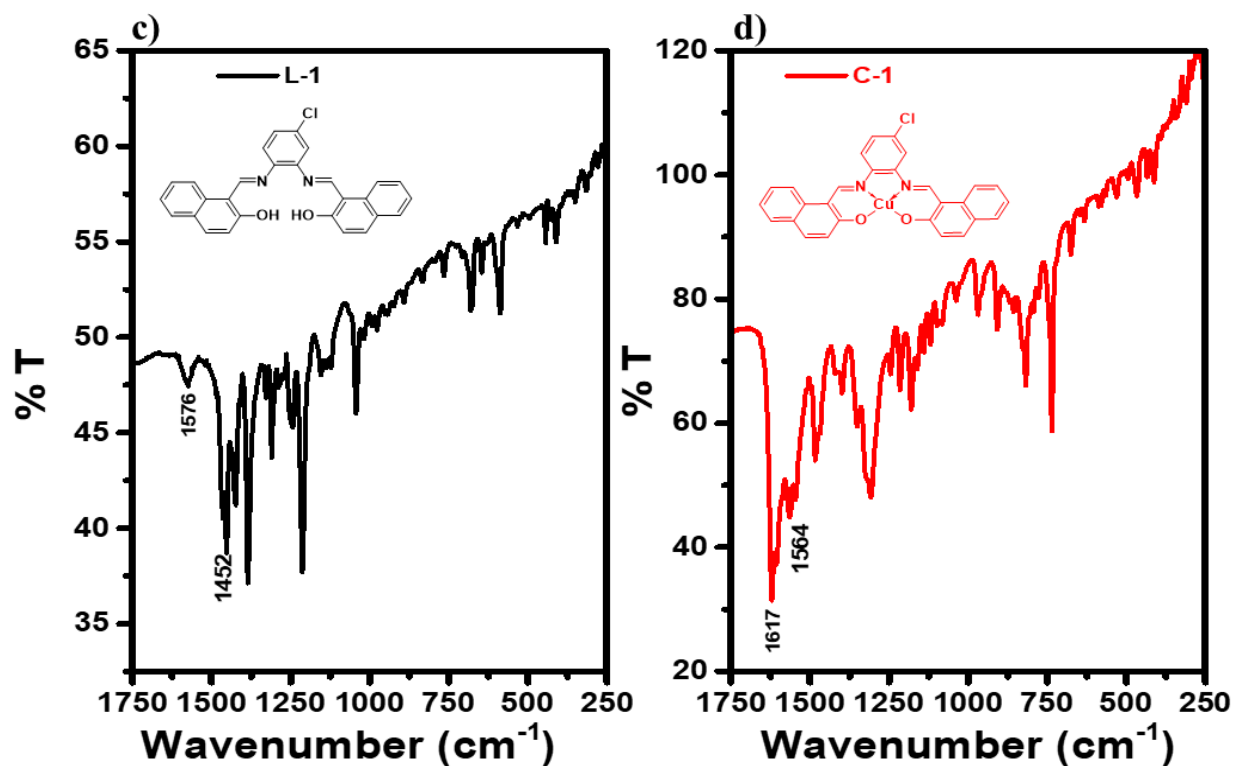

Figure S4. FTIR spectra of the L-1 ligand (a,c) and the C-1 complex (b,d).

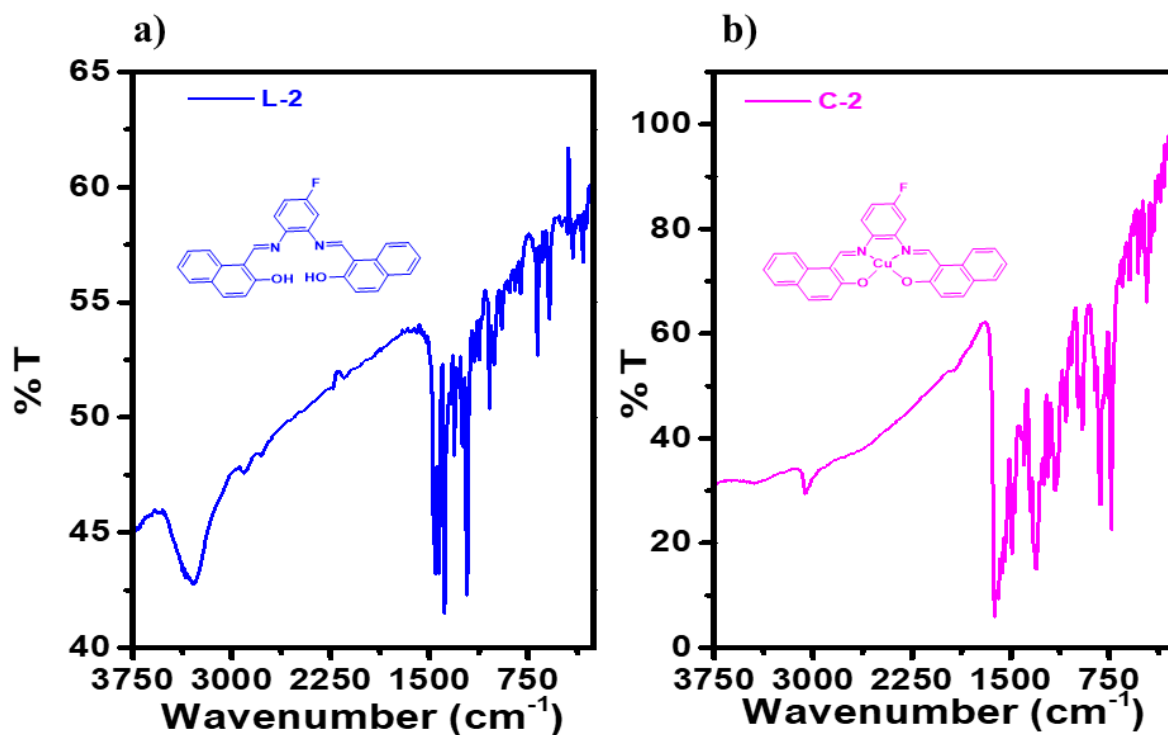

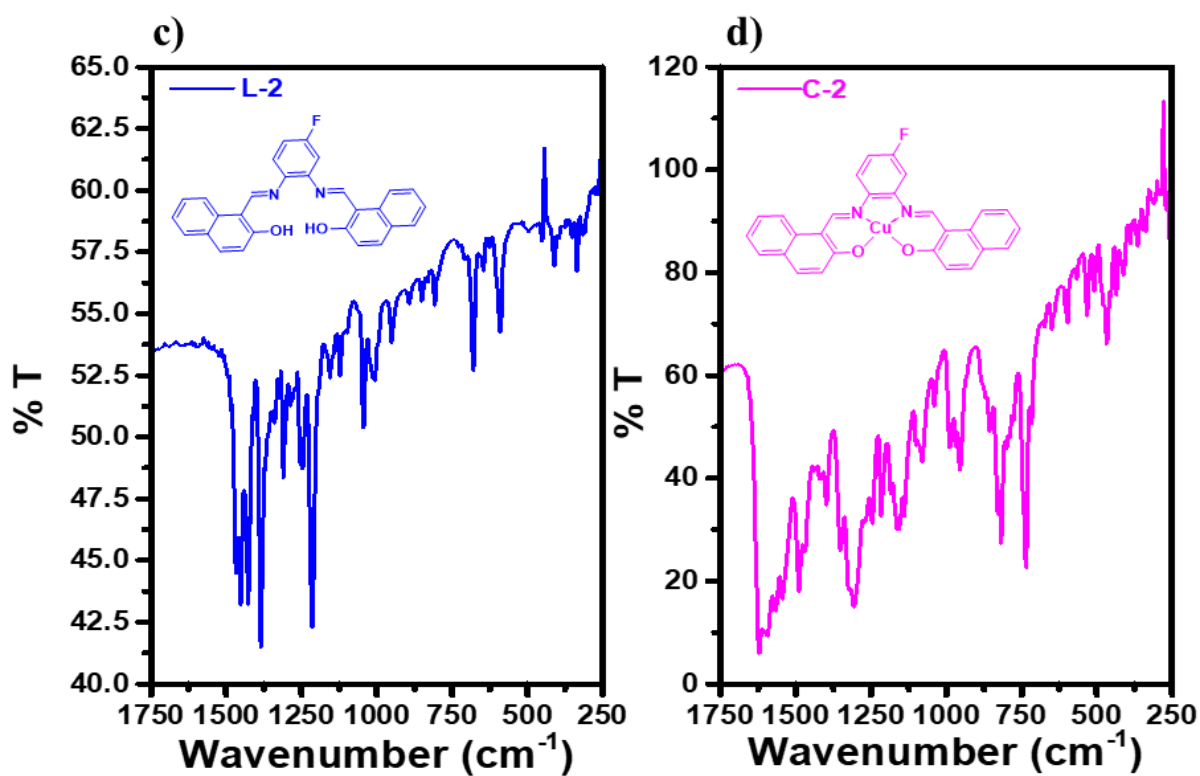

Figure S5. FTIR spectra of the L-2 ligand (a,c) and the C-2 complex (b,d).

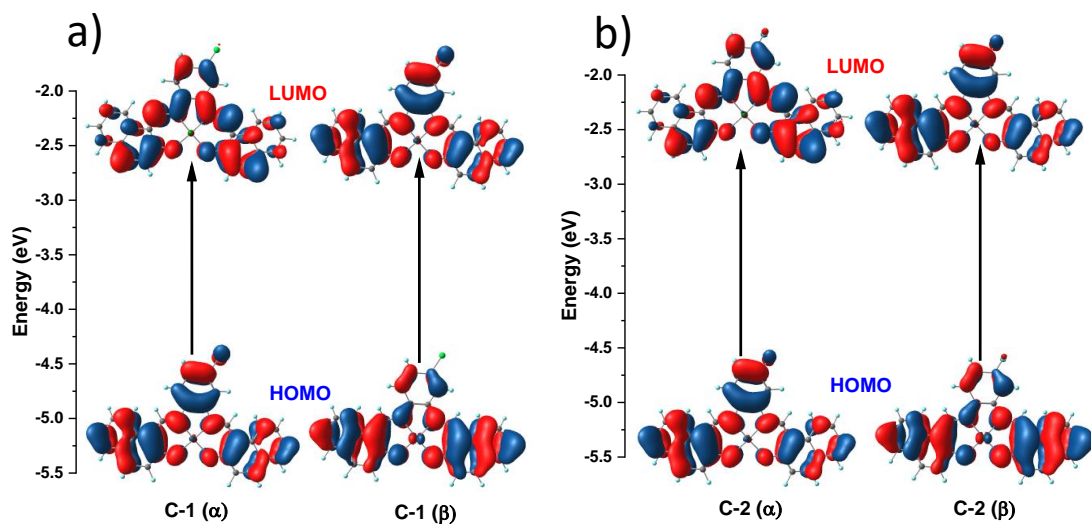

Figure S6 Frontier molecular orbitals for the C-1 (a) and C-2 complexes (b).

**Table S2.** Absorption energies ( $\lambda$ ), oscillator strength ( $f$ ), major transitions (MT), and percentage weight contribution for the B3LYP/6-31G (d, p) level of theory in combination with LANL2DZ basis set.

| Molecules | State                    | $\lambda$ (nm) | $f$   | MT                      | %Ci |
|-----------|--------------------------|----------------|-------|-------------------------|-----|
| C-1       | $S_0 \rightarrow S_9$    | 445            | 0.237 | 126A $\rightarrow$ 127A | 30  |
|           |                          |                |       | 111B $\rightarrow$ 126B | 7   |
|           |                          |                |       | 112B $\rightarrow$ 126B | 12  |
|           |                          |                |       | 113B $\rightarrow$ 126B | 8   |
|           |                          |                |       | 125B $\rightarrow$ 127B | 31  |
|           | $S_0 \rightarrow S_{10}$ | 439            | 0.162 | 126A $\rightarrow$ 127A | 10  |
|           |                          |                |       | 103B $\rightarrow$ 126B | 15  |
|           |                          |                |       | 109B $\rightarrow$ 126B | 7   |
|           |                          |                |       | 111B $\rightarrow$ 126B | 11  |
|           |                          |                |       | 112B $\rightarrow$ 126B | 15  |
|           |                          |                |       | 113B $\rightarrow$ 126B | 9   |
|           |                          |                |       | 120B $\rightarrow$ 126B | 5   |
|           |                          |                |       | 125B $\rightarrow$ 127B | 12  |
| C-2       | $S_0 \rightarrow S_9$    | 448            | 0.246 | 122A $\rightarrow$ 123A | 35  |
|           |                          |                |       | 109B $\rightarrow$ 122B | 16  |
|           |                          |                |       | 121B $\rightarrow$ 123B | 36  |
|           | $S_0 \rightarrow S_{10}$ | 440            | 0.085 | 122A $\rightarrow$ 123A | 5   |
|           |                          |                |       | 99B $\rightarrow$ 122B  | 6   |
|           |                          |                |       | 100B $\rightarrow$ 122B | 13  |
|           |                          |                |       | 106B $\rightarrow$ 122B | 8   |
|           |                          |                |       | 109B $\rightarrow$ 122B | 45  |
|           |                          |                |       | 121B $\rightarrow$ 123B | 6   |

**Table S3.** Calculated HOMO and LUMO energies, and HLG (in eV) for the Cu (II) complexes.

| Complexes | $E_{\text{HOMO}}$ (eV) | $E_{\text{LUMO}}$ (eV) | HLG  |
|-----------|------------------------|------------------------|------|
| C-1       | -5.42                  | -2.21                  | 3.21 |
| C-2       | -5.36                  | -2.16                  | 3.20 |
